# Supplementary material for: Cystic Fibrosis Mice Are Highly Susceptible to Repeated Acute Pseudomonas aeruginosa Pneumonia after Intranasal Inoculation
Source: Hindawi journal article supplement (doi:10.1155/2024/4769779), 2024-02-05
Supplement: f1 [file 4769779.f1.pdf]

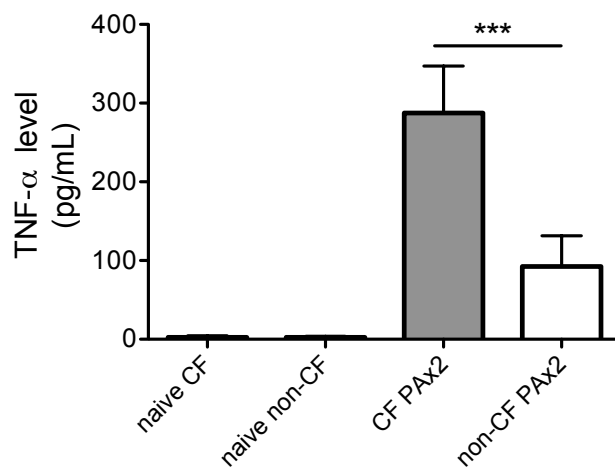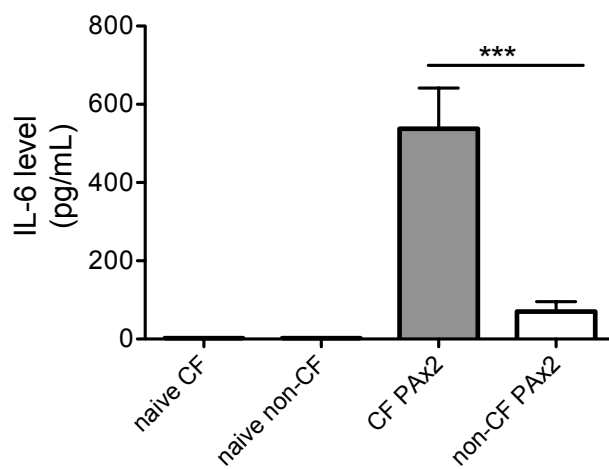

**Supplementary Figure 1. TNF- $\alpha$  and IL-6 levels in the lungs.** CF and non-CF mice were subjected to PA instillation twice. At 6 hours after the second instillation, lungs were obtained and subjected to homogenization followed by TNF- $\alpha$  and IL-6 measurement. Data were shown as mean  $\pm$  S.D. of 4 samples per group. One-way ANOVA with *post hoc* Bonferroni analysis was performed. \*\*\*  $p < 0.001$ .

a.

### Lung NK cells

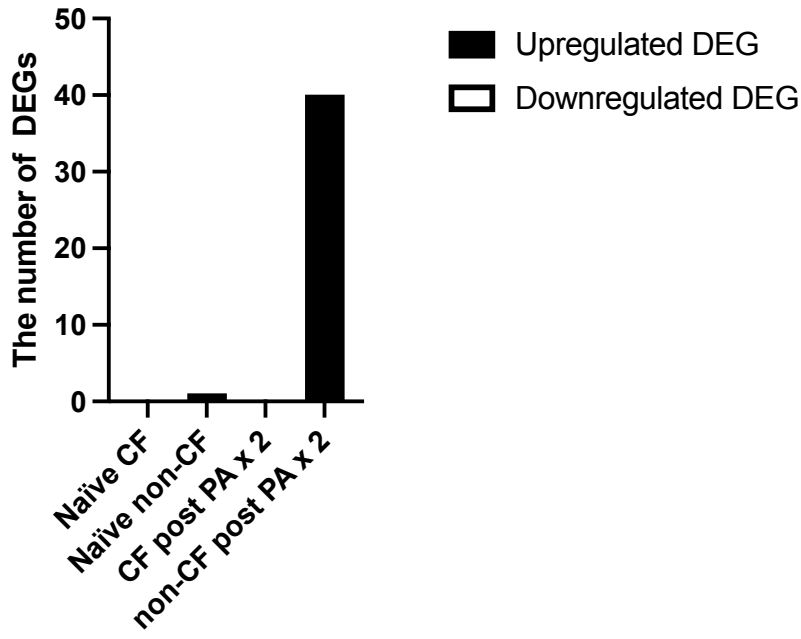

b.

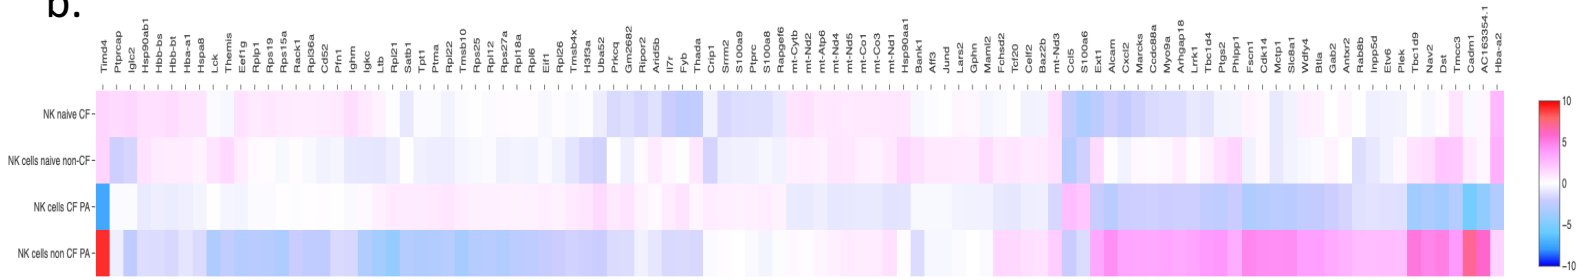

### Supplementary Figure 2. Single cell RNA sequencing analysis of lung NK cells

(a) Heatmap of lung NK cell differentially expressed genes (DEGs).

(b) The number of up- and down-regulated DEGs.





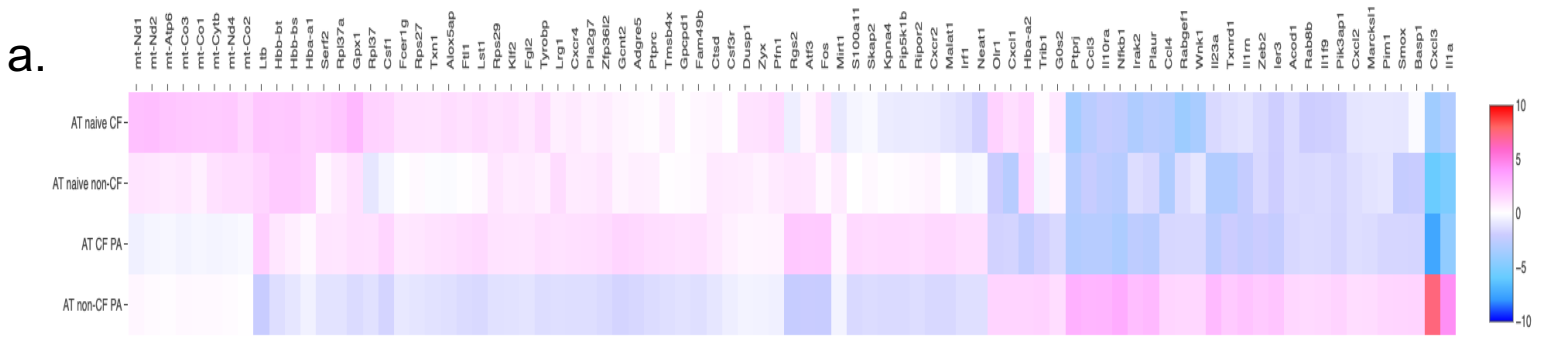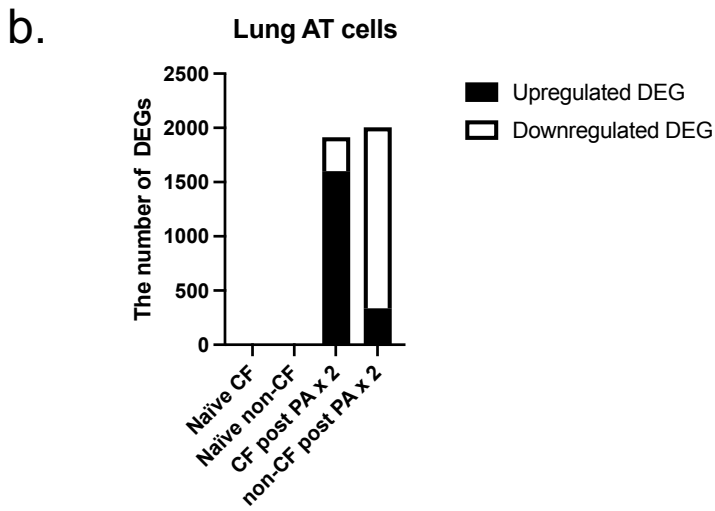

**c.** **CF lung post PA x 2**

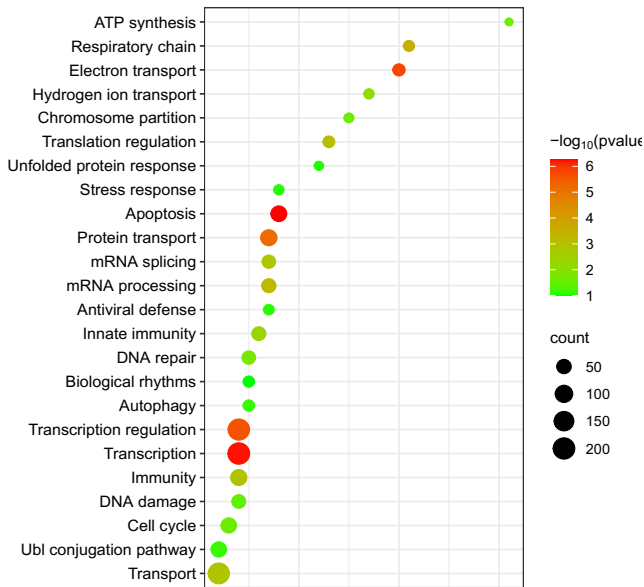

**Non-CF lung post PA x 2**

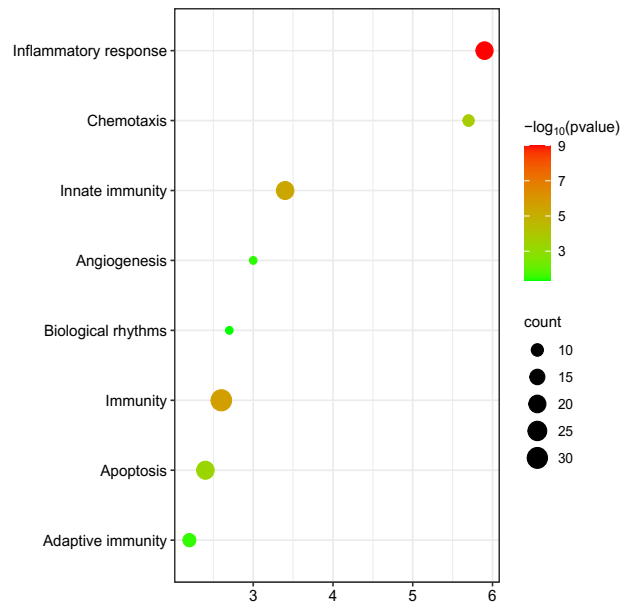

**d.** **CF lung post PA x 2**

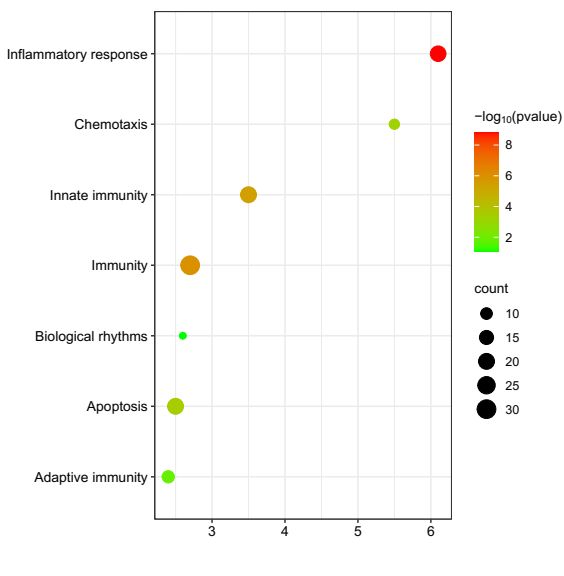

**Non-CF lung post PA x 2**

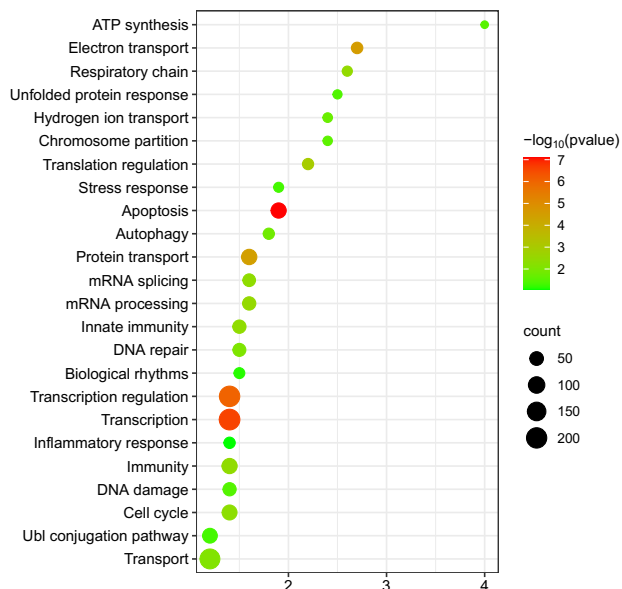

**Supplementary Figure 5. Single cell RNA sequencing analysis of lung AT cells**

(a) Heatmap of lung AT cell differentially expressed genes (DEGs). (b) The number of up- and down-regulated DEGs. (c) Upregulated DEGs in CF and non-CF lung AT cells were subjected to KEGG pathway analysis and presented as bubble enrichment maps. (d) Downregulated DEGs in CF and non-CF lung AT cells were subjected to KEGG pathway analysis and presented as bubble enrichment maps.
